# Supplementary material
Source: PubMed Central journal article supplement (PMC2311340)
Supplement: 0800868105_Supplemental_PDF.pdf [file 0800868105_Supplemental_PDF.pdf]

# Supporting Information

Alphs *et al.* 10.1073/pnas.0800868105

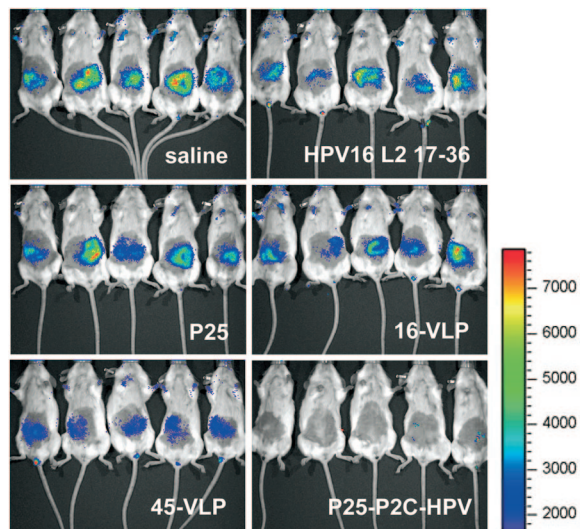

**Fig. S1.** P25-P2C-HPV vaccination protects mice from cutaneous challenge with HPV45. BALB/c mice were vaccinated s.c. three times with saline, HPV16 L2 17–36 peptide, P25 peptide, HPV45 L1 VLP, HPV16 L1 VLP, or P25-P2C-HPV and challenged on their belly with HPV45 pseudovirions carrying a luciferase reporter 2 weeks after the third immunization (week 10). To detect pseudoinfection, the mice were injected with luciferin 3 days after viral challenge and imaged for bioluminescence by using the IVIS 200 imaging system.
